# Supplementary material for: CRISPR/Cas9‐mediated targeted mutagenesis of GmFT2a delays flowering time in soya bean
Source: PubMed Central journal article supplement (PMC5785355; doi:10.1111/pbi.12758), 2017-06-20
Supplement: PBI-16-176-s001.pdf [file PBI-16-176-s001.pdf]

**Table S1** Potential off-target analysis at the three target sites of *GmFT2a* in the T1 generation

| Target site   | Putative off-target site |        |                       | No. of plants sequenced <sup>c</sup> | No. of plants with mutations |   |
|---------------|--------------------------|--------|-----------------------|--------------------------------------|------------------------------|---|
|               | Gene locus               | Region | Sequence <sup>a</sup> |                                      |                              |   |
| <i>GmFT2a</i> | Glyma19g24640            | intron | GTgGtGAaCCTCTCGTTGTT  | 3                                    | 18                           | 0 |
|               | 19:-30300772             |        | GGG                   |                                      |                              |   |
| -SP1          | Glyma16g26690            | exon   | GTAGGGAcCCTCTaGTTGT   | 2                                    | 18                           | 0 |
|               | 16:+30780526             |        | TGGG                  |                                      |                              |   |
| <i>GmFT2a</i> | Glyma12g35200            | utr    | CACAcGTgGgaAACCAACC   | 4                                    | 35                           | 0 |
|               | 12:-38349846             |        | AAGG                  |                                      |                              |   |
| -SP2          | Glyma15g10400            | intron | CtCAtGTTtTCAACCAAgCA  | 4                                    | 35                           | 0 |
|               | 15:+7538434              |        | AGG                   |                                      |                              |   |
| <i>GmFT2a</i> | Glyma09g11720            | utr    | gtCtGATATTaACCCTTGTT  | 4                                    | 11                           | 0 |
|               | 9:-11946423              |        | GG                    |                                      |                              |   |
| -SP3          | Glyma16g26690            | exon   | CACCGATATTTAttCTTGGT  | 2                                    | 11                           | 0 |
|               | 16:-30780651             |        | TGG                   |                                      |                              |   |

<sup>a</sup> Mismatched bases are shown in lowercase letters. <sup>b</sup> No. of mismatched bases. <sup>c</sup> T1 plants identified as biallelic mutants of *GmFT2a*.

**Text S1** Frameshift mutations at three target sites of *GmFT2a* generated premature translation termination codons (PTCs)

**CDS of *GmFT2a* (WT, wild-type)**

ATGCCTAGTGGAAGTAGGGATCCTCTCGTTGTTGGGGGAGTAATTGGGGATGTATTGGATCCTTTTGAATATTCTATTCC  
TATGAGGGTTACCTACAATAACAGAGATGTCAGCAATGGATGTGAATTCAAACCCTCACAAAGTTGTCAACCAACCAAG  
GGTAAATATCGGTGGTGTATGACCTCAGGAACCTCTATACTTTGATTGCGGTTGATCCCGATGCACCTAGCCCAAGTGAC  
CCCAATTTGAGAGAATACCTCCATTGGTTGGTGACTGATATCCAGCAACAACAGGGGCTAGTTTCGGCCATGAGGTT  
GTAACATATGAAAGTCCAAGACCAATGATGGGGATTATCGTTTGGTGTGTTTGTGTTATTTCGTCAACTGGGTAGGGAGA  
CCGTGTATGCACCAGGATGGCGCCAGAATTTCAACACTAAAGAATTTGCTGAACTTTACAACCTTGGATTGCCAGTTG  
CTGCTGTCTATTTCAACATTCAGAGGGAATCTGGTCTGGTGGGAAGGAGTTATACTAA

**Protein sequence of *GmFT2a* (WT, wild-type)**

MPSGSRDPLVGGVIGDVLDPFEYSIPMRVTYNNRDVSNNGCEFKPSQVVNQPRVNIGDDLRNFYTLIAVDPDAPSPSPDN  
LREYLHLVLTDPATTGASFGHEVVYTESPRPMMGIHRLVFLFRQLGRETVYAPGWRQNFNTKEFAELYNLGLPVAAVYF  
NIQRESGSGRRLY

***GmFT2a*-SP1 (1-bp insertion)**

CDS

ATGCCTAGTGGAAGTAGGGATCCTCTCGTTTGGTGGGAGTAATTGGGGATGTATTGGATCCTTTTGAATATTCTATTCC  
CTATGAGGGTTACCTACAATAACAGAGATGTCAGCAATGGATGTGAATTCAAACCCTCACAAAGTTGTCAACCAACCAA  
GGGTAATATCGGTGGTGTATGACCTCAGGAACCTCTATACTTTGATTGCGGTTGATCCCGATGCACCTAGCCCAAGTGA  
CCCAATTTGAGAGAATACCTCCATTGGTTGGTGACTGATATCCAGCAACAACAGGGGCTAGTTTCGGCCATGAGGT  
TGTAACATATGAAAGTCCAAGACCAATGATGGGGATTATCGTTTGGTGTGTTTGTGTTATTTCGTCAACTGGGTAGGGAG  
ACCGTGTATGCACCAGGATGGCGCCAGAATTTCAACACTAAAGAATTTGCTGAACTTTACAACCTTGGATTGCCAGTT  
GCTGCTGTCTATTTCAACATTCAGAGGGAATCTGGTCTGGTGGGAAGGAGTTATACTAA

Protein sequence

MPSGSRDPLVCWGSNWGCIGSF Stop

***GmFT2a*-SP1 (8-bp deletion)**

CDS

ATGCCTAGTGGAAGTAGGGATC-----GTTGGGAGTAATTGGGGATGTATTGGATCCTTTTGAATATTCTATTCCATG  
AGGGTTACCTACAATAACAGAGATGTCAGCAATGGATGTGAATTCAAACCCTCACAAAGTTGTCAACCAACCAAGGGTA  
AATATCGGTGGTGTATGACCTCAGGAACCTCTATACTTTGATTGCGGTTGATCCCGATGCACCTAGCCCAAGTGACCCCA  
ATTTGAGAGAATACCTCCATTGGTTGGTGACTGATATCCAGCAACAACAGGGGCTAGTTTCGGCCATGAGGTTGTAA  
CATATGAAAGTCCAAGACCAATGATGGGGATTATCGTTTGGTGTGTTTGTGTTATTTCGTCAACTGGGTAGGGAGACCGT  
GTATGCACCAGGATGGCGCCAGAATTTCAACACTAAAGAATTTGCTGAACTTTACAACCTTGGATTGCCAGTTGCTGC  
TGTCTATTTCAACATTCAGAGGGAATCTGGTCTGGTGGGAAGGAGTTATACTAA

Protein sequence

MPSGSRDRWGSNWGCIGSF Stop

***GmFT2a*-SP2 (1-bp insertion)**

CDS

ATGCCTAGTGGAAGTAGGGATCCTCTCGTTGTTGGGGGAGTAATTGGGGATGTATTGGATCCTTTTGAATATTCTATTCC  
TATGAGGGTTACCTACAATAACAGAGATGTCAGCAATGGATGTGAATTCAAACCCTCACAAAGTTGTCAACCAACCAAG  
GGTAAATATCGGTGGTGTATGACCTCAGGAACCTCTATACTTTGATTGCGGTTGATCCCGATGCACCTAGCCCAAGTGA  
CCCAATTTGAGAGAATACCTCCATTGGTTGGTGACTGATATCCAGCAACAACAGGGGCTAGTTTCGGCCATGAGGT  
TGTAACATATGAAAGTCCAAGACCAATGATGGGGATTATCGTTTGGTGTGTTTGTGTTATTTCGTCAACTGGGTAGGGAG

ACCGTGTATGCACCAGGATGGCGCCAGAATTTCAACACTAAAGAATTTGCTGAACTTTACAACCTTGGATTGCCAGTT  
GCTGCTGTCTATTTCAACATTCAGAGGGAATCTGGTTCTGGTGAAGGAGGTTATACTAA

Protein sequence

MPSGSRDPLVGGVIGDVLDPFEYSIPMRVTYNNRDVSNNGCEFKPSQVVNQTKGKYRW Stop

***GmFT2a*-SP2 (4-bp deletion)**

CDS

ATGCCTAGTGAAGTAGGGATCCTCTCGTTGTTGGGGGAGTAATTGGGGATGTATTGGATCCTTTTGAATATTCTATTCC  
TATGAGGGTTACCTACAATAACAGAGATGTCAGCAATGGATGTGAATCAAACCCTCACAAGTTGTCAA---CCAAGGG  
TAAATATCGGTGGTGTGACCTCAGGAACTTCTATACTTTGATTGCGGTTGATCCCGATGCACCTAGCCCAAGTGACCC  
CAATTTGAGAGAATACCTCCATTGGTTGGTGACTGATATCCCAGCAACAACAGGGGCTAGTTTCGGCCATGAGGTTGT  
AACATATGAAAGTCCAAGACCAATGATGGGGATTCATCGTTTGGTGTGTTGTTATTTCGTCAACTGGGTAGGGAGACC  
GTGTATGCACCAGGATGGCGCCAGAATTTCAACACTAAAGAATTTGCTGAACTTTACAACCTTGGATTGCCAGTTGCT  
GCTGTCTATTTCAACATTCAGAGGGAATCTGGTTCTGGTGAAGGAGGTTATACTAA

Protein sequence

MPSGSRDPLVGGVIGDVLDPFEYSIPMRVTYNNRDVSNNGCEFKPSQVVNQG Stop

***GmFT2a*-SP3 (14-bp deletion)**

CDS

ATGCCTAGTGAAGTAGGGATCCTCTCGTTGTTGGGGGAGTAATTGGGGATGTATTGGATCCTTTTGAATATTCTATTCC  
TATGAGGGTTACCTACAATAACAGAGATGTCAGCAATGGATGTGAATCAAACCCTCACAAGTTGTCAACCAACC-----  
-----GTGGTGAATGACCTCAGGAACTTCTATACTTTGATTGCGGTTGATCCCGATGCACCTAGCCCAAGTGACCCCAATTT  
GAGAGAATACCTCCATTGGTTGGTGACTGATATCCCAGCAACAACAGGGGCTAGTTTCGGCCATGAGGTTGTAACATAT  
GAAAGTCCAAGACCAATGATGGGGATTCATCGTTTGGTGTGTTGTTATTTCGTCAACTGGGTAGGGAGACCGTGTATG  
CACCAGGATGGCGCCAGAATTTCAACACTAAAGAATTTGCTGAACTTTACAACCTTGGATTGCCAGTTGCTGTCTCTA  
TTTCAACATTCAGAGGGAATCTGGTTCTGGTGAAGGAGGTTATACTAA

Protein sequence

MPSGSRDPLVGGVIGDVLDPFEYSIPMRVTYNNRDVSNNGCEFKPSQVVNQPW Stop

***GmFT2a*-SP3 (1-bp insertion)**

CDS

ATGCCTAGTGAAGTAGGGATCCTCTCGTTGTTGGGGGAGTAATTGGGGATGTATTGGATCCTTTTGAATATTCTATTCC  
TATGAGGGTTACCTACAATAACAGAGATGTCAGCAATGGATGTGAATCAAACCCTCACAAGTTGTCAACAACCAAA  
GGGTAATATCGGTGTGATGACCTCAGGAACTTCTATACTTTGATTGCGGTTGATCCCGATGCACCTAGCCCAAGTGA  
CCCAATTTGAGAGAATACCTCCATTGGTTGGTGACTGATATCCCAGCAACAACAGGGGCTAGTTTCGGCCATGAGGT  
TGTAACATATGAAAGTCCAAGACCAATGATGGGGATTCATCGTTTGGTGTGTTGTTATTTCGTCAACTGGGTAGGGAG  
ACCGTGTATGCACCAGGATGGCGCCAGAATTTCAACACTAAAGAATTTGCTGAACTTTACAACCTTGGATTGCCAGTT  
GCTGTCTATTTCAACATTCAGAGGGAATCTGGTTCTGGTGAAGGAGGTTATACTAA

Protein sequence

MPSGSRDPLVGGVIGDVLDPFEYSIPMRVTYNNRDVSNNGCEFKPSQVVNQPKGKYRW Stop

**Text S1** Frameshift mutations at three target sites of *GmFT2a* generated premature translation termination codons (PTCs). CDS, coding sequence. Blue capital letter, target sequence. Red capital letter, protospacer adjacent motif. Underline, insertions. Dashes, deletions. Yellow rectangle, termination codon.

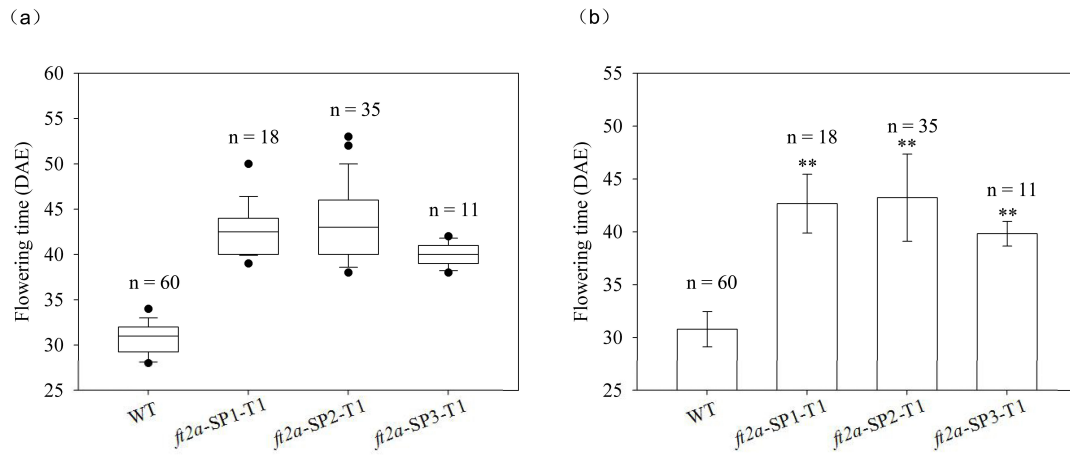

**Figure S1** Homozygous *ft2a* mutants at three target sites in the T1 generation delayed flowering time under natural conditions (summer) in Beijing, China (N39°58', E116°20'). WT, wild-type plant (Jack). *ft2a*-SP1-T1, *ft2a*-SP2-T1 and *ft2a*-SP3-T1 were homozygous mutants of *GmFT2a* at the three target sites in the T1 generation, respectively. n, exact numbers of individual plants identified. The flowering time are shown as the mean values  $\pm$  standard deviation. \*\*, homozygous T1 *ft2a* mutants exhibit highly significant late flowering ( $P < 0.01$ ). DAE, days after emergence.

**Table S2** T2 *ft2a* mutants under LD and SD conditions

| T1 homozygous<br><i>ft2a</i> mutants | The types of<br>homozygous mutations | No. of the progeny<br>plants under LD conditions | No. of the progeny<br>plants under SD conditions | Total |
|--------------------------------------|--------------------------------------|--------------------------------------------------|--------------------------------------------------|-------|
| <i>ft2a</i> -SP1-T1#11.14            | 1-bp insertion at <i>GmFT2a</i> -SP1 | 4                                                | 3                                                | 7     |
| <i>ft2a</i> -SP1-T1#11.15            | 1-bp insertion at <i>GmFT2a</i> -SP1 | 8                                                | 6                                                | 14    |
| <i>ft2a</i> -SP1-T1#11.16            | 1-bp insertion at <i>GmFT2a</i> -SP1 | 7                                                | 6                                                | 13    |
| <i>ft2a</i> -SP2-T1#16.04            | 1-bp insertion at <i>GmFT2a</i> -SP2 | 7                                                | 8                                                | 15    |
| <i>ft2a</i> -SP2-T1#16.11            | 1-bp insertion at <i>GmFT2a</i> -SP2 | 7                                                | 8                                                | 15    |
| <i>ft2a</i> -SP2-T1#16.12            | 1-bp insertion at <i>GmFT2a</i> -SP2 | 8                                                | 7                                                | 15    |
| <i>ft2a</i> -SP3-T1#30.02            | 14-bp deletion at <i>GmFT2a</i> -SP3 | 3                                                | 3                                                | 6     |
| <i>ft2a</i> -SP3-T1#30.08            | 14-bp deletion at <i>GmFT2a</i> -SP3 | 6                                                | 6                                                | 12    |
| <i>ft2a</i> -SP3-T1#30.12            | 14-bp deletion at <i>GmFT2a</i> -SP3 | 6                                                | 6                                                | 12    |
| Total                                |                                      | 56                                               | 53                                               | 109   |

**Text S2** The sequences of the Cas9 and *Arabidopsis U6* promoter used in the present study.

**Cas9 DNA sequence**

atgccctaagaagaagagaaggctggtattcacggcgttctgcccgatggacaagaatagatgattggtctggacattgggacgaattcgttggctggccgtgatcaccgatgagt  
acaaggctccctccaagaagtttaaggcttgggaacaccgatcggcacagatcaagaagaatctcattggacccctctgtcactcagccgagaccgccgaacaaggctcaag  
agaaccgaaggagacggtatataagaagaagaatagatctgtctacctgaggagatttcagcaacgaaatggcgaagggtggacgattcgttttcatagattggaggaggttctcgt  
tcgaggagataagaagcagagaggcatcctatcttggcaacattgtcagcagggttgcctatcacgaaaagtaccaccacaatctatctgtcgggaagaagcttggactcactgataag  
gcggacctgattgatctacctcgtctggcacacatgattaaagtcaaggccatfttctgatcagggggatcttaaccggacaatagcgtgagcaaggttgcacccagctcctcaaa  
cctacaatcagctcttggaaaaccaatfaatgctcagcgtcagccaaggcgtcctgtctcagcccttcaaagtctcggcgttgaactgatcctcaaccggcgaa  
aagaagaacggctgttgggaatcctgactccttggggctcacaccaactcaagaataatttgatctcgtgagcagcaagctgagcttccaaggacactatgacgatgacc  
tggataaccttggccaaatcggcgtacgtacggacttctcctcgcgcaagaatttgcgacgcgatcctcctgagtgatattctccgcgtgacaccgggattacaaggccccc  
ctctcggcgtgatgatcaagcgtatgatcagcagcaccatcaggatctgaccccttgaaggcttggccgagcaactccagagaagfacaaggaaatcttcttgatcaatccaagaacgg  
ctacgctggttataatgacggcggggcctcgcagggaattctacaagttatcaagcaatctggagaagatggatggcacaggaactcctgtgaaagctcaataggaggaccttgg  
cggaaacaaagaacttgcataacggcagcaccctcaccagattcactcggggagctcagccactcctgagaagcaggaagacttctacccttcttaaggataaccgggagaagatc  
gaaaagattctgacgttcagaattcgtactatgtcggaccctcggcgggtaattccagattgctggatgaccagaagagcgggaaacatcacaccttgaactcggaggaagtg  
tcgataaggcgtctccgcacagagcttattgagcgtacgacaatttgaacaagaccctcctaagagaagcttcccaagcattccctctgtacgagatfctactgtttatacgaactc  
acgaagggtgaagtatgaccgagggaatcgcgaagcccctcctgagcggcagcaaaaagaagcgtatggtgaccttggtaagcaatcgaaggctcagacttaagcagctcaa  
ggaggactactcaagaagattgaatgcttgcattccgttgatcagcggcgtggaagacaggttaacgcgtcactgggacttaccagatctcctgaagatcattaaggataagacttct  
ggacaacgagggaaatgagatctcctgaagacattgctcactcttactgttggagataggaaatgatcgggaacgcttgaagacgtatgccatctctgatgacaaggtatgaa  
gcagctcaagaagaagataaccggatggggaaggtgtcccgaagcttataatggcattagagacaagcaatcagggaaacaactcctgacttttgaagctgatgcttccgcaac  
aggaatttatgacgtgattcagatgactcacttcaaggagatccagaaggctcaaggtcgggacaaggtgacagctcgcacgacatatacccaacttgcgggatcctcgtca  
atcaagaagggtattctcagacagctcaaggttggatgagctgtgaaagctatgggacggcagataagcccgagaacatcgttattgagatggccagagaaaatcagaccacaaaaagggt  
cagaagaactcagggagcgcgatgaagcgcacaggaagcattaaaggagctgggagctcagatcctaaaggacaccgggtgaaaacacgcagttgcaaaaatgagaagctctatctgt  
actatctgcaaaatggcagggatattgtgaccaggaggtggatattaaccgctcctcggacttaccgacgtcagatcagatcttctcagctccttcaaggatgacagcttgaacaataagggt  
ctcaccaggtccagaagaaccggggaagctccgataatgtcccagcaggaagctgtaagaagatgaagaactactgagggcaacttttgaatccaagttgatcacacagaggaagttt  
gataacctcaaaagccgcgagcgggaggtctcagcaactggacaagcgggcttcaaaagcgaactggtgagactagacagatcacgaagcagctggcgcagattctcgttaccg  
catgaacaggaatgacgatgagaatgacaagctatccgggaagtgaaagctatcccttcaagctcgttctgactcaggaagattccaatttataaggtgcccggagatcaaca  
attatcaccatgctcatgacatacctcaacgctgtggtcggaaacgattgattaaagatccgaaagctcagctccgaattcgtgacggtgactataaggtttacgatgtgccaagatgat  
cgcaagtcagagcaggaattggcaagccactcgaagatttttacttcaactatgaaatttcttaagactgagatcacgctggctaatggcgaatccggaagaccactattgag  
accaacggcgagacaggggaaatcgtgtgggacaaggggaggttccacagctccgcaaggttctctatgctcctaagtgataattgcaagaagactgaaagtcagagggcggggt  
ctcaaaagaaatctattctgccaagcgaactggataagcttctcgcagaagaagactgggaccgcaagaagatggaggttctgactaccaacggctgcttactgtcctggtgtgg  
caaaagtgagaaaggaagctcaaaagctcaagctgtcaaggaactcctgggtatcaccattatggagaggtccagcttcaaaaagatccgatcgaatttctcagcgaagggatata  
aggaagtgaagaagacactgatcattaaagctcaagtagcttctcaggttggaaaacggcaggaagcgcaggttggctcgcaggaagctccaagaaggtaacagctgttctggc  
gtccaagtatgtaactcctatctgcatccactacgagaagctcaaggcagcccaggaataacgaagcaagcaactggttgggacacacaagcattatctgacgagatcattg  
aacagatttccgagttcagtaagcgcgtatcctcggcagcgaattggataaggttctcagcctacaacaagcaccgggacaagcctatcagagagcagcggaaaatattcatctc  
ttaccctgacaaccttgggctcccgtcattcaagattttgacactacgattgatcggaaagatacacttctcagaagaggtgctggatgcaaccttaccaccaatcattactggcc  
tctagagacgcgctgactgagctcagctcggggggataagaccagcggcaaccaagaagcaggaagcaagcaaggaagaagagtag

***Arabidopsis U6* promoter**

ttcgtgaaacaacgaaactcacttccctccgacaatacatcatttcttctgctttttcttctctcgttcatacagttttttgtttatcagcttacatttcttgaaccgtagctttcttcttctt  
tttaactttcattcggagttttgtatcttcttcatagtttgcctccaggtatgaatgattgacatcgaacctcaagaatttgattgaataaacatcttacttcttaagatagaagataatctcaaaa  
ggcccttgggaatcgaagaagaagcagggccattatattggaaagaacaatgatttcttatatagcccaattaaagttgaaaacaatctcaaaagtcaccatcctgataagaaaaa  
cgaagctgagttatatacagctagatcgaagtagtgattg

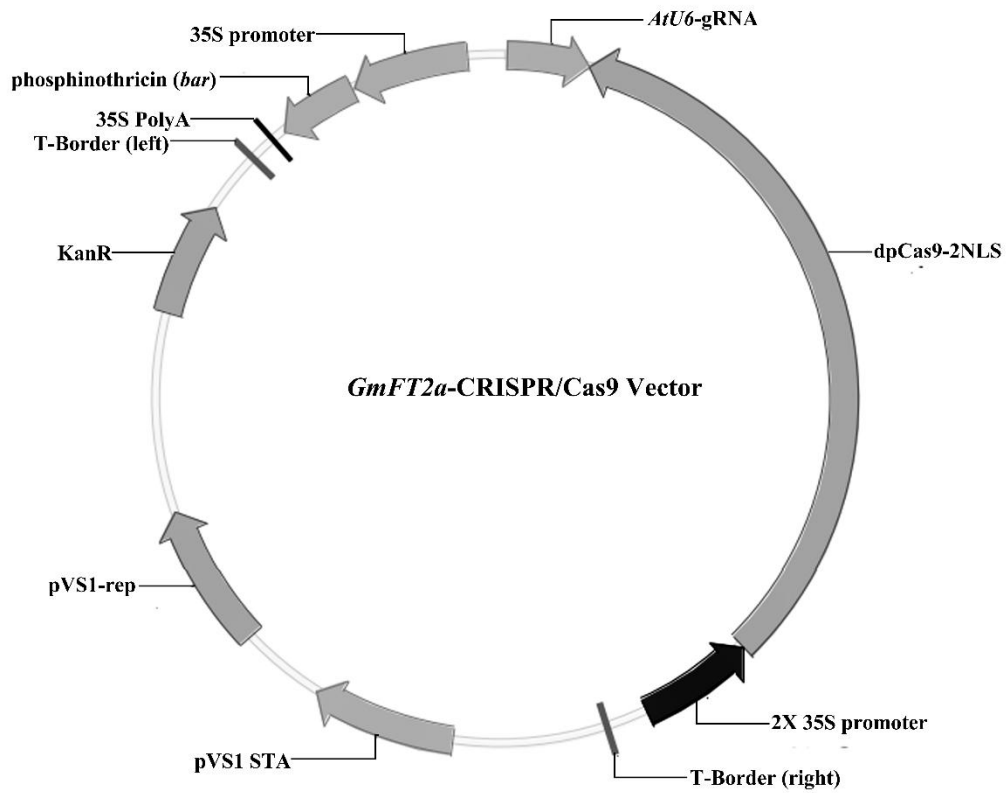

**Figure S2** Schematic illustrating the basic architecture of the constructs used for CRISPR/Cas9-mediated genome editing.

*AtU6*, *Arabidopsis U6* promoter. gRNA, guide-RNA. dpCas9, Cas9 codon-optimized for dicotyledons. NLS, nuclear localization sequence. The *bar* gene driven by a CaMV 35S promoter is used as a screening marker. KanR, kanamycin resistance gene. pVS1-rep, pVS1 replication origin. pVS1 STA, pVS1 stability function.

**Table S3** Primer sequences used in the present study

| Primer name         | Primer sequence          | Size (bp) | Purpose                                                                                              |
|---------------------|--------------------------|-----------|------------------------------------------------------------------------------------------------------|
| <i>GmFT2a</i> -F    | ATTCATAACAAAGCAAACGAG    | 653       | To amplify the regions which span the target sites                                                   |
| <i>GmFT2a</i> -R    | ACTTGACCTTCCCTTAAACAC    |           |                                                                                                      |
| OFF1-F              | CGGAGACAAAATGCAGCAGG     | 684       | To examine potential off-target site 1                                                               |
| OFF1-R              | GGCCTACAACATATGCTCCCC    |           |                                                                                                      |
| OFF2-F              | GGGTCATGCAGAACTCACCT     | 533       | To examine potential off-target site 2                                                               |
| OFF2-R              | TGTGACGTTTGCATGTCTTTTT   |           |                                                                                                      |
| OFF3-F              | GGGAAGAGTTTCGGGTCGTT     | 608       | To examine potential off-target site 3                                                               |
| OFF3-R              | AAGGTTTCTCATGGTCGGTGT    |           |                                                                                                      |
| OFF4-F              | GGCATCATTGCCCATTTGTT     | 426       | To examine potential off-target site 4                                                               |
| OFF4-R              | AACCAAGGAATCAAGTGAAAGCAT |           |                                                                                                      |
| OFF5-F              | AAATTTTATGGCACCACTACCTGC | 701       | To examine potential off-target site 5                                                               |
| OFF5-R              | CTCATCACCATCGCCATCTCT    |           |                                                                                                      |
| OFF6-F              | GGGTCATGCAGAACTCACCT     | 533       | To examine potential off-target site 6                                                               |
| OFF6-R              | TGTGACGTTTGCATGTCTTTTT   |           |                                                                                                      |
| Cas9-F              | TTGGGGCTCACACCAAACCTT    | 910       | To amplify part of the Cas9 coding sequence                                                          |
| Cas9-R              | CGATCGCCTTCTTTTGCTCG     |           |                                                                                                      |
| sgRNA-F             | AAAAGGCCCTGGGAATCTG      | 593       | To amplify the region from the <i>AtU6</i> promoter to downstream vector sequence spanning the sgRNA |
| sgRNA-R             | GATGAAGTGGACGGAAGGAAGGAG |           |                                                                                                      |
| <i>GmActin</i> -F   | CGGTGGTTCTATCTTGGCATC    | 249       | To amplify <i>GmActin</i> as a normalization control.                                                |
| <i>GmActin</i> -R   | GTCTTTCGCTTCAATAACCCTA   |           |                                                                                                      |
| q <i>GmFT2a</i> -F  | GGATTGCCAGTTGCTGCTGT     | 160       | qRT-PCR analysis ( <i>GmFT2a</i> )                                                                   |
| q <i>GmFT2a</i> -R  | GAGTGTGGGAGATTGCCAAT     |           |                                                                                                      |
| q <i>GmActin</i> -F | CGGTGGTTCTATCTTGGCATC    | 249       | qRT-PCR analysis ( <i>GmActin</i> )                                                                  |
| q <i>GmActin</i> -R | GTCTTTCGCTTCAATAACCCTA   |           |                                                                                                      |
